# Supplementary material for: Using the wax moth larva Galleria mellonella infection model to detect emerging bacterial pathogens
Source: PubMed Central journal article supplement (PMC6322482; doi:10.7717/peerj.6150), 2019-01-04

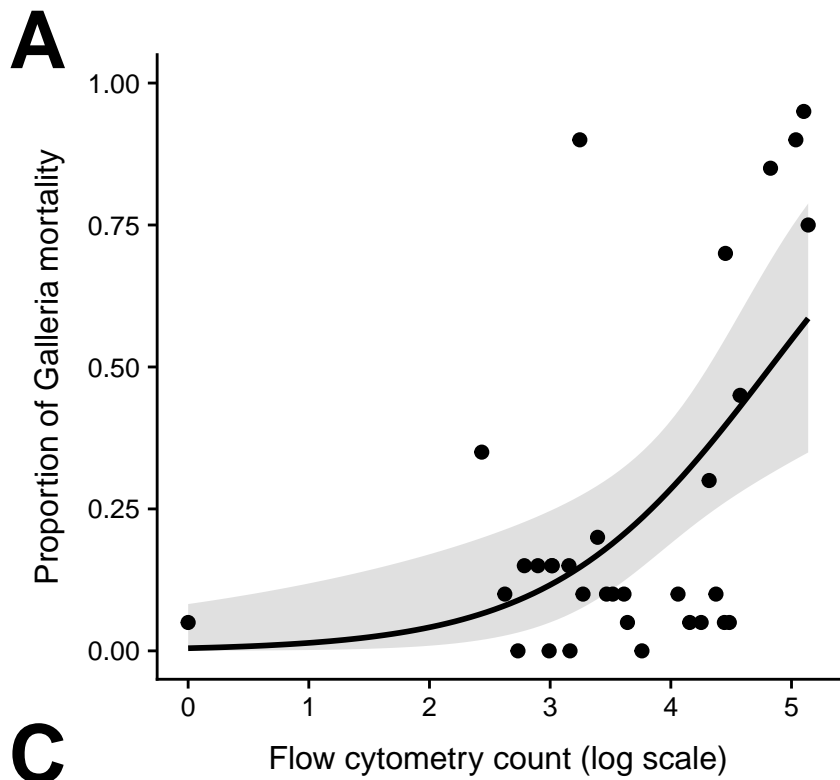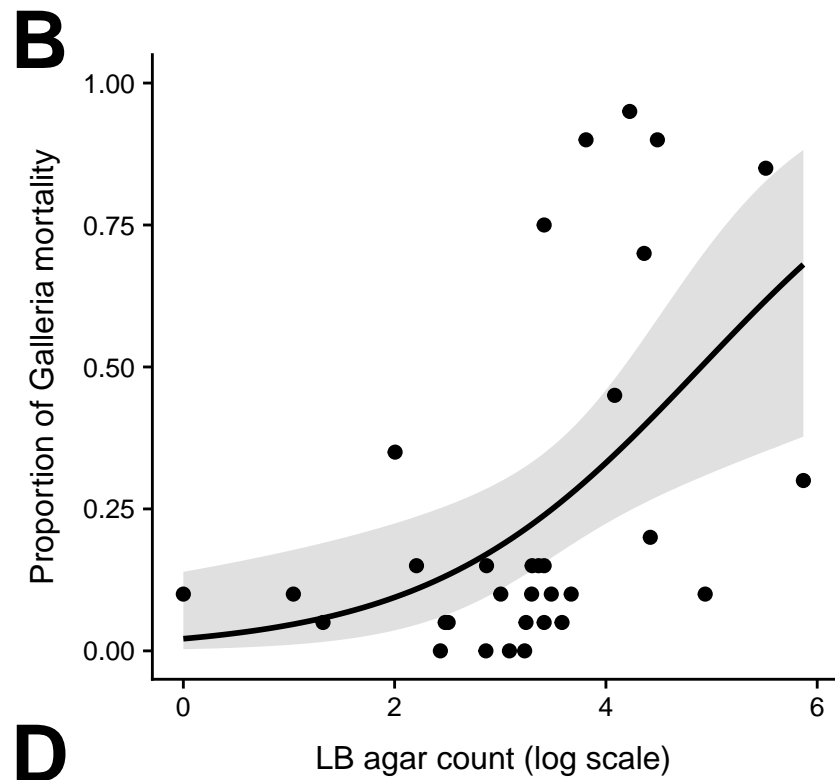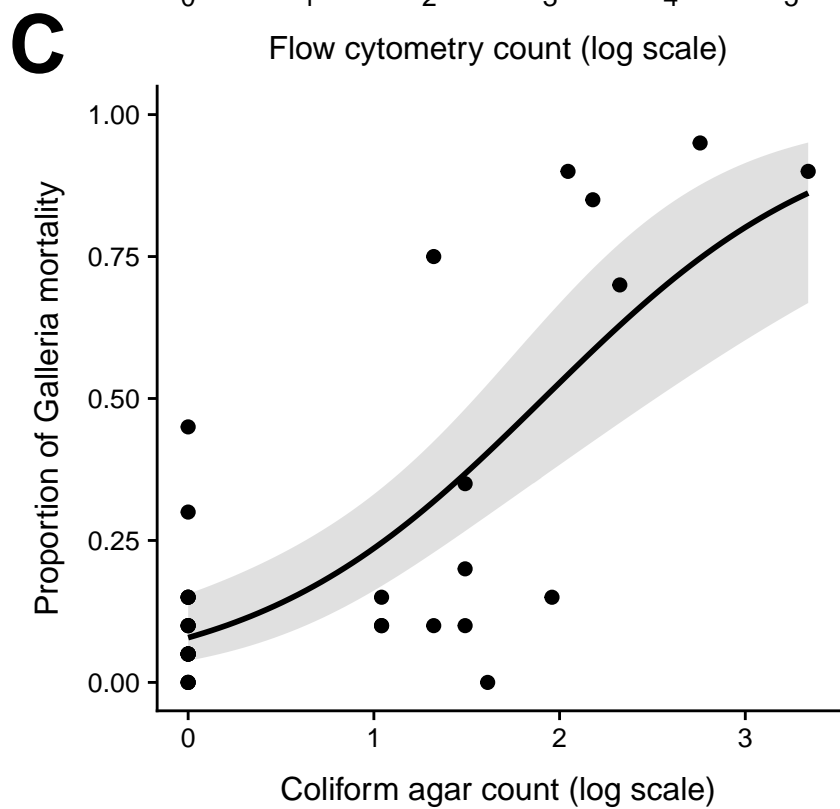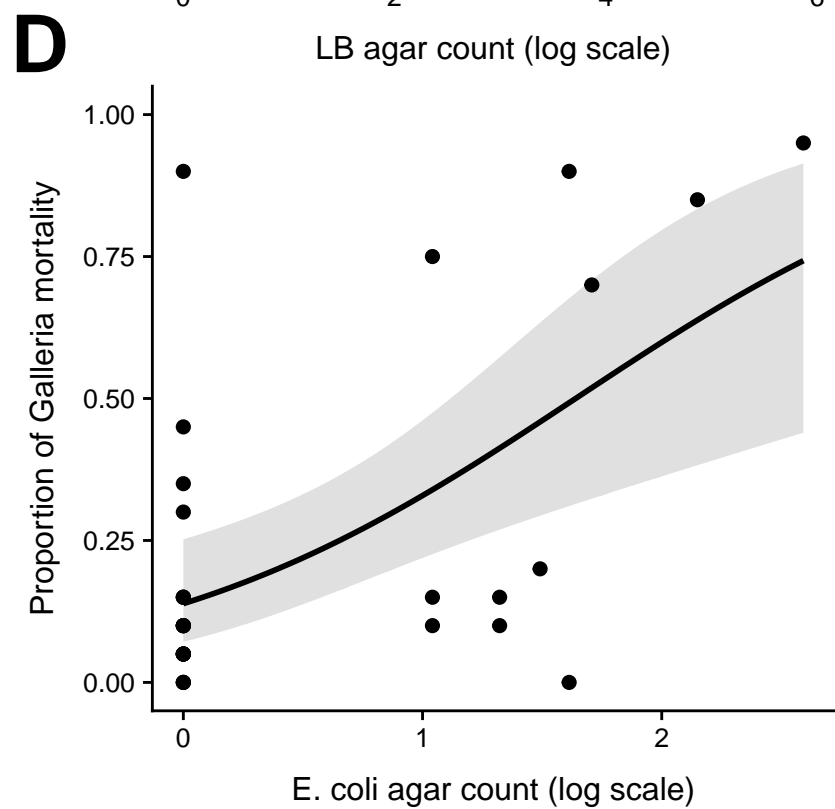

Supplement: peerj-07-6150-s012.pdf [file peerj-07-6150-s012.pdf]
