# Supplementary material for: Using the wax moth larva Galleria mellonella infection model to detect emerging bacterial pathogens
Source: PeerJ. 2019 Jan 4;6:e6150. doi: 10.7717/peerj.6150 (PMC6322482; doi:10.7717/peerj.6150)
Supplement: Supplemental Information 13 [file peerj-07-6150-s013.xls]

## Sheet: Figure 1
Figure 1 Galleria survival curves (%, n=20)
		Fig 1A: Proteus mirabilis			Fig. 1B: Vibrio injenensis			Fig. 1C: Pseudomonas aeruginosa			Fig. 1D: Escherichia coli
	inoculation CFU	100 CFU	10,000 CFU	1,000,000 CFU	100 CFU	10,000 CFU	1,000,000 CFU	100 CFU	10,000 CFU	1,000,000 CFU	100 CFU	10,000 CFU	1,000,000 CFU
	hours
	10	100	100	20	100	100	100	100	100	100	100	90	70
	11	25	5	0	100	100	100	100	100	100	95	85	65
	12	5	0		100	100	100	100	100	100	80	65	45
	13	5			100	100	100	100	100	75	75	65	35
	14	0			100	100	95	100	100	10	75	40	0
	15				100	100	95	95	60	0	75	35
	16				100	100	95	65	60		75	35
	17				100	100	90	65	10		75	35
	18				100	100	65	20	10		70	35
	19				100	95	40	5	0		70	35
	20				100	95	35	0			65	35
	21				100	85	25				65	35
	22				95	80	20				65	35
	23				95	65	0				65	35
	24				95	50					65	35
	31				95	50					65	35
	34				95	50					65	35
	37				95	50					65	35

## Sheet: Figure S1
Table A: 21-Jun-17 Galleria % Survival: Sediment Data								Legend: Location
Location	0 Hours	24 Hours	48 Hours	72 Hours				MH	Mylor Harbour
MH	100	55	10	10				FluH	Flushing Harbour
FluH	100	95	95	95				PH	Penryn Harbour
PH	100	40	20	15				FalH	Falmouth Harbour
FalH	100	70	70	70				CB	Castle Beach
CB	100	45	30	30				GB	Gylly Beach
GB	100	95	95	95				SB	Swanpool Beach
SB	100	90	90	90				MB	Maenporth Beach
MB	100	85	85	85
M9 Buffer	100	100	100	100				M9 Buffer	Negative Control Group
Table B: 21-Jun-17 Galleria % Survival: Water Data
Location	0 Hours	24 Hours	48 Hours	72 Hours
MH	100	90	90	90
FluH	100	95	85	85
PH	100	90	80	80
FalH	100	100	100	100
CB	100	80	65	65
GB	100	90	90	90
SB	100	85	85	85
MB	100	100	100	100
M9 Buffer	100	100	100	100
Table C: 06-Jul-17 Galleria % Survival: Sediment Data
Location	0 Hours	24 Hours	48 Hours	72 Hours
MH	100	35	25	25
FluH	100	60	55	55
PH	100	20	10	5
FalH	100	100	100	95
CB	100	90	90	90
GB	100	95	95	95
SB	100	95	95	95
MB	100	100	95	95
M9 Buffer	100	100	100	100
Table D: 06-Jul-17 Galleria % Survival: Water Data
Location	0 Hours	24 Hours	48 Hours	72 Hours
MH	100	90	85	85
FluH	100	100	100	100
PH	100	95	90	90
FalH	100	95	90	90
CB	100	30	10	10
GB	100	85	85	85
SB	100	95	95	90
MB	100	100	100	100
M9 Buffer	100	100	100	100

## Sheet: Figure S2
Table A: Flow Cytometry Count
Location	Location_Type	Sample	Date	Flow_Cytometry_Count_per_10_microliters			Legend: Location			Location Type
MH	E	s	1	108690			MH	Mylor Harbour		E	Estuary
MH	E	s	2	137520			FluH	Flushing Harbour		O	Ocean
MH	E	w	1	4090			PH	Penryn Harbour
MH	E	w	2	1040			FalH	Falmouth Harbour		Sample:
FluH	E	s	1	4370			CB	Castle Beach		S	Sediment
FluH	E	s	2	37530			GB	Gylly Beach		W	Water
FluH	E	w	1	1430			SB	Swanpool Beach
FluH	E	w	2	980			MB	Maenporth Beach		Date:
PH	E	s	1	67020						1	2017-06-21
PH	E	s	2	126370						2	2017-07-06
PH	E	w	1	2470
PH	E	w	2	11470
FalH	E	s	1	20770
FalH	E	s	2	30530
FalH	E	w	1	5760
FalH	E	w	2	3300
CB	O	s	1	28350
CB	O	s	2	23660
CB	O	w	1	270
CB	O	w	2	1760
GB	O	s	1	0
GB	O	s	2	17840
GB	O	w	1	420
GB	O	w	2	790
SB	O	s	1	2930
SB	O	s	2	14340
SB	O	w	1	1030
SB	O	w	2	1870
MB	O	s	1	610
MB	O	s	2	27790
MB	O	w	1	540
MB	O	w	2	1460
Table B: LB Agar Count
Location	Location_Type	Sample	Date	LB_Agar_CFU_100mLWater_or_10gSed
MH	E	s	1	6480
MH	E	s	2	2600
MH	E	w	1	87000
MH	E	w	2	2300
FluH	E	s	1	2600
FluH	E	s	2	12100
FluH	E	w	1	2000
FluH	E	w	2	270
PH	E	s	1	326000
PH	E	s	2	16800
PH	E	w	1	26300
PH	E	w	2	4690
FalH	E	s	1	740000
FalH	E	s	2	3840
FalH	E	w	1	1700
FalH	E	w	2	1980
CB	O	s	1	23000
CB	O	s	2	3040
CB	O	w	1	100
CB	O	w	2	30700
GB	O	s	1	20
GB	O	s	2	320
GB	O	w	1	10
GB	O	w	2	160
SB	O	s	1	0
SB	O	s	2	300
SB	O	w	1	740
SB	O	w	2	1010
MB	O	s	1	2600
MB	O	s	2	1750
MB	O	w	1	730
MB	O	w	2	1220
Table C: Coliform Agar Count
Location	Location_Type	Sample	Date	Coliform_Agar_CFU_100mLWater_or_10gSed
MH	E	s	1	110
MH	E	s	2	20
MH	E	w	1	10
MH	E	w	2	90
FluH	E	s	1	0
FluH	E	s	2	0
FluH	E	w	1	0
FluH	E	w	2	0
PH	E	s	1	150
PH	E	s	2	570
PH	E	w	1	30
PH	E	w	2	20
FalH	E	s	1	0
FalH	E	s	2	0
FalH	E	w	1	0
FalH	E	w	2	0
CB	O	s	1	210
CB	O	s	2	10
CB	O	w	1	30
CB	O	w	2	2180
GB	O	s	1	0
GB	O	s	2	0
GB	O	w	1	0
GB	O	w	2	0
SB	O	s	1	0
SB	O	s	2	0
SB	O	w	1	10
SB	O	w	2	30
MB	O	s	1	0
MB	O	s	2	0
MB	O	w	1	40
MB	O	w	2	0
Table D: E.Coli Agar Count
Location	Location_Type	Sample	Date	E.Coli_Agar_CFU_100mLWater_or_10gSed
MH	E	s	1	40
MH	E	s	2	10
MH	E	w	1	10
MH	E	w	2	20
FluH	E	s	1	0
FluH	E	s	2	0
FluH	E	w	1	0
FluH	E	w	2	0
PH	E	s	1	140
PH	E	s	2	390
PH	E	w	1	30
PH	E	w	2	20
FalH	E	s	1	0
FalH	E	s	2	0
FalH	E	w	1	0
FalH	E	w	2	0
CB	O	s	1	50
CB	O	s	2	0
CB	O	w	1	0
CB	O	w	2	0
GB	O	s	1	0
GB	O	s	2	0
GB	O	w	1	0
GB	O	w	2	0
SB	O	s	1	0
SB	O	s	2	0
SB	O	w	1	10
SB	O	w	2	0
MB	O	s	1	0
MB	O	s	2	0
MB	O	w	1	40
MB	O	w	2	0

## Sheet: Figure S3
Table A: Flow Cytometry Count
Location	Location_Type	Sample	Date	Flow_Cytometry_Count_per_10_microliters	Galleria_Death_out_of_20_total			Legend: Location			Location Type
MH	E	s	1	108690	0.9			MH	Mylor Harbour		E	Estuary
MH	E	s	2	137520	0.75			FluH	Flushing Harbour		O	Ocean
MH	E	w	1	4090	0.1			PH	Penryn Harbour
MH	E	w	2	1040	0.15			FalH	Falmouth Harbour		Sample:
FluH	E	s	1	4370	0.05			CB	Castle Beach		S	Sediment
FluH	E	s	2	37530	0.45			GB	Gylly Beach		W	Water
FluH	E	w	1	1430	0.15			SB	Swanpool Beach
FluH	E	w	2	980	0			MB	Maenporth Beach		Date:
PH	E	s	1	67020	0.85						1	2017-06-21
PH	E	s	2	126370	0.95						2	2017-07-06
PH	E	w	1	2470	0.2
PH	E	w	2	11470	0.1
FalH	E	s	1	20770	0.3
FalH	E	s	2	30530	0.05
FalH	E	w	1	5760	0
FalH	E	w	2	3300	0.1
CB	O	s	1	28350	0.7
CB	O	s	2	23660	0.1
CB	O	w	1	270	0.35
CB	O	w	2	1760	0.9
GB	O	s	1	0	0.05
GB	O	s	2	17840	0.05
GB	O	w	1	420	0.1
GB	O	w	2	790	0.15
SB	O	s	1	2930	0.1
SB	O	s	2	14340	0.05
SB	O	w	1	1030	0.15
SB	O	w	2	1870	0.1
MB	O	s	1	610	0.15
MB	O	s	2	27790	0.05
MB	O	w	1	540	0
MB	O	w	2	1460	0
Table B: LB Agar Count
Location	Location_Type	Sample	Date	LB_Agar_CFU_100mLWater_or_10gSed	Galleria_Death_out_of_20_total
MH	E	s	1	6480	0.9
MH	E	s	2	2600	0.75
MH	E	w	1	87000	0.1
MH	E	w	2	2300	0.15
FluH	E	s	1	2600	0.05
FluH	E	s	2	12100	0.45
FluH	E	w	1	2000	0.15
FluH	E	w	2	270	0
PH	E	s	1	326000	0.85
PH	E	s	2	16800	0.95
PH	E	w	1	26300	0.2
PH	E	w	2	4690	0.1
FalH	E	s	1	740000	0.3
FalH	E	s	2	3840	0.05
FalH	E	w	1	1700	0
FalH	E	w	2	1980	0.1
CB	O	s	1	23000	0.7
CB	O	s	2	3040	0.1
CB	O	w	1	100	0.35
CB	O	w	2	30700	0.9
GB	O	s	1	20	0.05
GB	O	s	2	320	0.05
GB	O	w	1	10	0.1
GB	O	w	2	160	0.15
SB	O	s	1	0	0.1
SB	O	s	2	300	0.05
SB	O	w	1	740	0.15
SB	O	w	2	1010	0.1
MB	O	s	1	2600	0.15
MB	O	s	2	1750	0.05
MB	O	w	1	730	0
MB	O	w	2	1220	0
Table C: Coliform Agar Count
Location	Location_Type	Sample	Date	Coliform_Agar_CFU_100mLWater_or_10gSed	Galleria_Death_out_of_20_total
MH	E	s	1	110	0.9
MH	E	s	2	20	0.75
MH	E	w	1	10	0.1
MH	E	w	2	90	0.15
FluH	E	s	1	0	0.05
FluH	E	s	2	0	0.45
FluH	E	w	1	0	0.15
FluH	E	w	2	0	0
PH	E	s	1	150	0.85
PH	E	s	2	570	0.95
PH	E	w	1	30	0.2
PH	E	w	2	20	0.1
FalH	E	s	1	0	0.3
FalH	E	s	2	0	0.05
FalH	E	w	1	0	0
FalH	E	w	2	0	0.1
CB	O	s	1	210	0.7
CB	O	s	2	10	0.1
CB	O	w	1	30	0.35
CB	O	w	2	2180	0.9
GB	O	s	1	0	0.05
GB	O	s	2	0	0.05
GB	O	w	1	0	0.1
GB	O	w	2	0	0.15
SB	O	s	1	0	0.1
SB	O	s	2	0	0.05
SB	O	w	1	10	0.15
SB	O	w	2	30	0.1
MB	O	s	1	0	0.15
MB	O	s	2	0	0.05
MB	O	w	1	40	0
MB	O	w	2	0	0
Table D: E. Coli Agar Count
Location	Location_Type	Sample	Date	E.Coli_Agar_CFU_100mLWater_or_10gSed	Galleria_Death_out_of_20_total
MH	E	s	1	40	0.9
MH	E	s	2	10	0.75
MH	E	w	1	10	0.1
MH	E	w	2	20	0.15
FluH	E	s	1	0	0.05
FluH	E	s	2	0	0.45
FluH	E	w	1	0	0.15
FluH	E	w	2	0	0
PH	E	s	1	140	0.85
PH	E	s	2	390	0.95
PH	E	w	1	30	0.2
PH	E	w	2	20	0.1
FalH	E	s	1	0	0.3
FalH	E	s	2	0	0.05
FalH	E	w	1	0	0
FalH	E	w	2	0	0.1
CB	O	s	1	50	0.7
CB	O	s	2	0	0.1
CB	O	w	1	0	0.35
CB	O	w	2	0	0.9
GB	O	s	1	0	0.05
GB	O	s	2	0	0.05
GB	O	w	1	0	0.1
GB	O	w	2	0	0.15
SB	O	s	1	0	0.1
SB	O	s	2	0	0.05
SB	O	w	1	10	0.15
SB	O	w	2	0	0.1
MB	O	s	1	0	0.15
MB	O	s	2	0	0.05
MB	O	w	1	40	0
MB	O	w	2	0	0
